# Supplementary material for: Lower Respiratory Tract Pathogens and Their Antimicrobial Susceptibility Pattern: A 5-Year Study
Source: MDPI journal article supplement (doi:10.3390/antibiotics10070851), 2021-07-13
Supplement: s1 [file s1]

**Table S1:** Percentage trend of all bacterial isolates that caused LTRIs infections.

| Isolated species                    | 2015       | %    | 2016       | %    | 2017       | %    | 2018       | %    | 2019       | %    |
|-------------------------------------|------------|------|------------|------|------------|------|------------|------|------------|------|
| <i>Acinetobacter baumannii</i>      | 148        | 17.9 | 129        | 17.0 | 127        | 20.1 | 148        | 20.1 | 135        | 17.7 |
| <i>Pseudomonas aeruginosa</i>       | 109        | 13.2 | 88         | 11.6 | 88         | 13.9 | 117        | 15.9 | 122        | 16.0 |
| <i>Staphylococcus aureus</i>        | 105        | 12.7 | 121        | 16.0 | 102        | 16.2 | 113        | 15.3 | 121        | 15.9 |
| <i>Klebsiella pneumoniae</i>        | 80         | 9.7  | 102        | 13.5 | 71         | 11.3 | 60         | 8.1  | 89         | 11.7 |
| <i>Escherichia coli</i>             | 43         | 5.2  | 59         | 7.8  | 62         | 9.8  | 72         | 9.8  | 64         | 8.4  |
| <i>Stenotrophomonas maltophilia</i> | 24         | 2.9  | 21         | 2.8  | 23         | 3.6  | 31         | 4.2  | 33         | 4.3  |
| <i>Providencia stuartii</i>         | 22         | 2.7  | 17         | 2.2  | 25         | 4.0  | 17         | 2.3  | 6          | 0.8  |
| <i>Proteus mirabilis</i>            | 20         | 2.4  | 29         | 3.8  | 28         | 4.4  | 35         | 4.7  | 29         | 3.8  |
| <i>Enterobacter aerogenes</i>       | 64         | 7.7  | 18         | 2.4  | 9          | 1.4  | 7          | 0.9  | 7          | 0.9  |
| <i>Candida spp</i>                  | 52         | 6.3  | 25         | 3.3  | 5          | 0.8  | 11         | 1.5  | 11         | 1.4  |
| <i>Serratia marcescens</i>          | 18         | 2.2  | 12         | 1.6  | 4          | 0.6  | 11         | 1.5  | 13         | 1.7  |
| <i>Streptococcus pneumoniae</i>     | 15         | 1.8  | 12         | 1.6  | 6          | 1.0  | 7          | 0.9  | 14         | 1.8  |
| <i>Enterobacter cloacae</i>         | 13         | 1.6  | 19         | 2.5  | 17         | 2.7  | 18         | 2.4  | 19         | 2.5  |
| <i>Enterococcus faecalis</i>        | 12         | 1.4  | 14         | 1.8  | 9          | 1.4  | 21         | 2.8  | 21         | 2.8  |
| <i>Haemophilus influenzae</i>       | 12         | 1.4  | 9          | 1.2  | 7          | 1.1  | 10         | 1.4  | 11         | 1.4  |
| <i>Klebsiella oxytoca</i>           | 10         | 1.2  | 15         | 2.0  | 7          | 1.1  | 18         | 2.4  | 13         | 1.7  |
| <i>Staphylococcus haemolyticus</i>  | 10         | 1.2  | 12         | 1.6  | 5          | 0.8  | 9          | 1.2  | 11         | 1.4  |
| <i>Citrobacter koseri</i>           | 7          | 0.8  | 7          | 0.9  | 4          | 0.6  | 3          | 0.4  | 11         | 1.4  |
| <i>Staphylococcus epidermidis</i>   | 7          | 0.8  | 8          | 1.1  | 1          | 0.2  | 5          | 0.7  | 3          | 0.4  |
| <i>Acinetobacter junii</i>          | 5          | 0.6  | 4          | 0.5  | 2          | 0.3  | 1          | 0.1  | 1          | 0.1  |
| <i>Citrobacter freundii</i>         | 5          | 0.6  | 8          | 1.1  | 2          | 0.3  | 5          | 0.7  | 7          | 0.9  |
| <i>Raoultella planticola</i>        | 5          | 0.6  | 1          | 0.1  | 2          | 0.3  | 2          | 0.3  | 0          | 0.0  |
| <i>Sphingomonas paucimobilis</i>    | 5          | 0.6  | 0          | 0.0  | 0          | 0.0  | 1          | 0.1  | 0          | 0.0  |
| <i>Streptococcus agalactiae</i>     | 5          | 0.6  | 4          | 0.5  | 7          | 1.1  | 1          | 0.1  | 1          | 0.1  |
| <i>Enterococcus faecium</i>         | 4          | 0.5  | 3          | 0.4  | 2          | 0.3  | 4          | 0.5  | 5          | 0.7  |
| <i>Morganella morganii</i>          | 4          | 0.5  | 4          | 0.5  | 4          | 0.6  | 1          | 0.1  | 3          | 0.4  |
| <i>Streptococcus viridans group</i> | 4          | 0.5  | 3          | 0.4  | 0          | 0.0  | 0          | 0.0  | 0          | 0.0  |
| <i>Achromobacter denitrificans</i>  | 3          | 0.4  | 2          | 0.3  | 3          | 0.5  | 1          | 0.1  | 1          | 0.1  |
| <i>Pseudomonas fluorescens</i>      | 3          | 0.4  | 3          | 0.4  | 1          | 0.2  | 3          | 0.4  | 3          | 0.4  |
| <i>Pseudomonas putida</i>           | 3          | 0.4  | 3          | 0.4  | 3          | 0.5  | 1          | 0.1  | 4          | 0.5  |
| <i>Achromobacter xylosoxidans</i>   | 2          | 0.2  | 0          | 0.0  | 2          | 0.3  | 2          | 0.3  | 1          | 0.1  |
| <i>Acinetobacter lwoffii</i>        | 2          | 0.2  | 1          | 0.1  | 1          | 0.2  | 1          | 0.1  | 1          | 0.1  |
| <i>Raoultella ornithinolytica</i>   | 2          | 0.2  | 1          | 0.1  | 0          | 0.0  | 0          | 0.0  | 0          | 0.0  |
| <i>Serratia liquefaciens</i>        | 2          | 0.2  | 1          | 0.1  | 1          | 0.2  | 0          | 0.0  | 1          | 0.1  |
| <i>Serratia plymuthica</i>          | 2          | 0.2  | 0          | 0.0  | 0          | 0.0  | 1          | 0.1  | 1          | 0.1  |
| <i>Kluyvera cryocrescens</i>        | 1          | 0.1  | 2          | 0.3  | 1          | 0.2  | 1          | 0.1  | 0          | 0.0  |
| <b>Total</b>                        | <b>828</b> |      | <b>757</b> |      | <b>631</b> |      | <b>738</b> |      | <b>762</b> |      |
